# Supplementary material
Source: Royal Society of Chemistry journal article supplement (doi:10.1039/d6nr00779a)
Supplement: d6nr00779a1.pdf [file d6nr00779a1.pdf]

## **Bilayer PAM-PVA Cartilage-Inspired Hydrogels with Layer-Selective CNT and Nanodiamond Interfacial Reinforcement for Structure-Property Control**

Nehal<sup>1</sup>, Murli Manohar<sup>2</sup>, Komal<sup>1\*</sup>, Kantesh Balani<sup>2\*</sup>, and Shikha Awasthi<sup>3\*</sup>

<sup>1</sup>Department of Chemistry, Manipal University Jaipur, Jaipur-303007, India

<sup>2</sup>Department of Materials Science and Engineering, IIT, Kanpur-208016, India

<sup>3</sup>Department of Basic Sciences, IES College of Technology, Bhopal - 462044, Madhya Pradesh, India

Corresponding author's e-mail:

[komal.arora@jaipur.manipal.edu](mailto:komal.arora@jaipur.manipal.edu) (Komal)

[kbalani@iitk.ac.in](mailto:kbalani@iitk.ac.in) (Kantesh Balani)

[shikha.awasthi@jaipur.manipal.edu](mailto:shikha.awasthi@jaipur.manipal.edu) (Shikha Awasthi)

## Supplementary Material

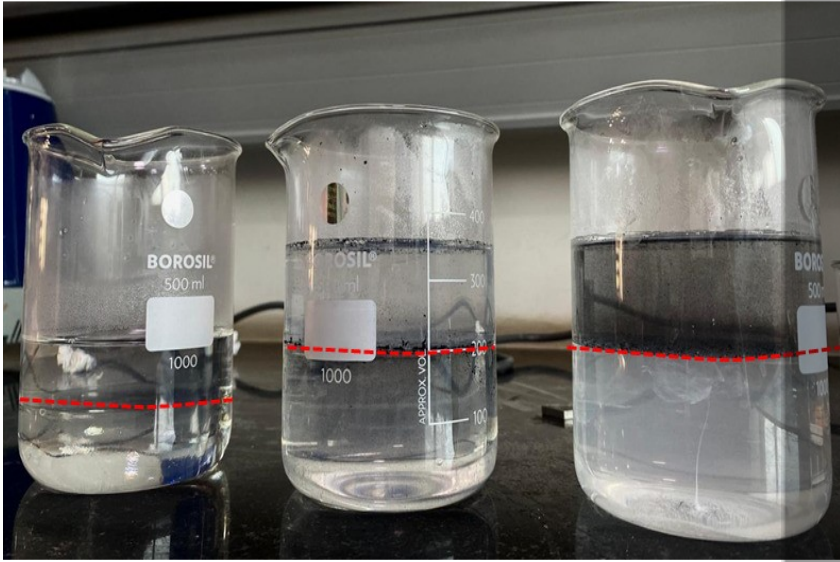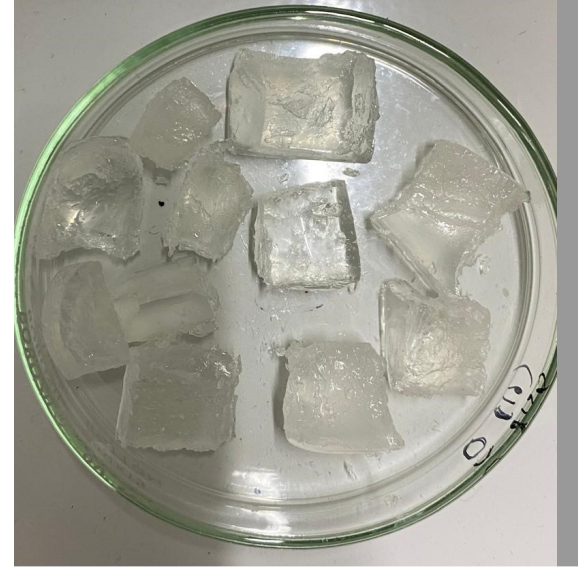

**Figure S1** (A). PAM/PVA hydrogel composite, (B) PAM-CNT/PVA-ND hydrogel composite, (C) PAM-ND/PVA-CNT hydrogel composite, (d) dried hydrogel composite

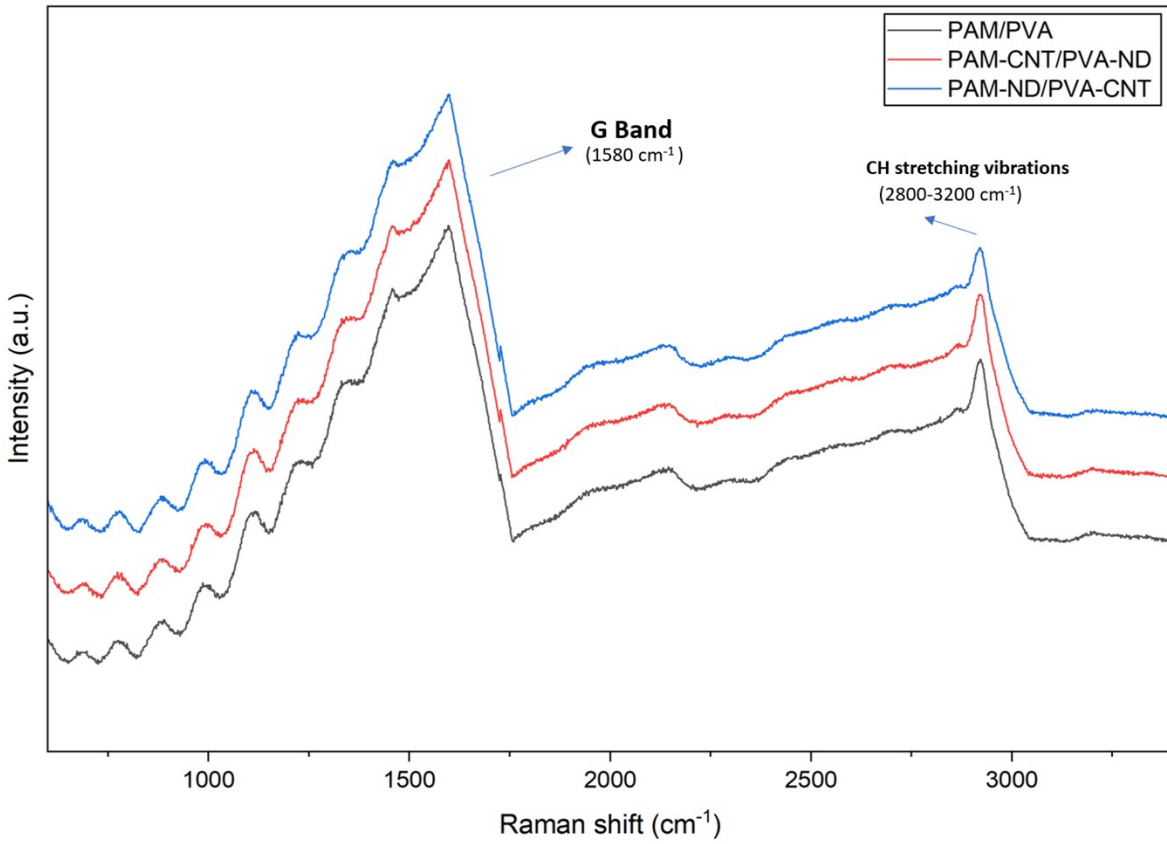

**Figure S2.** Raman spectra of double-layer hydrogel samples

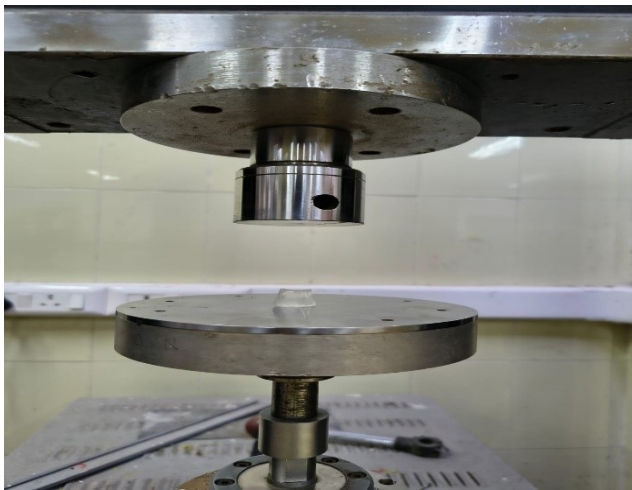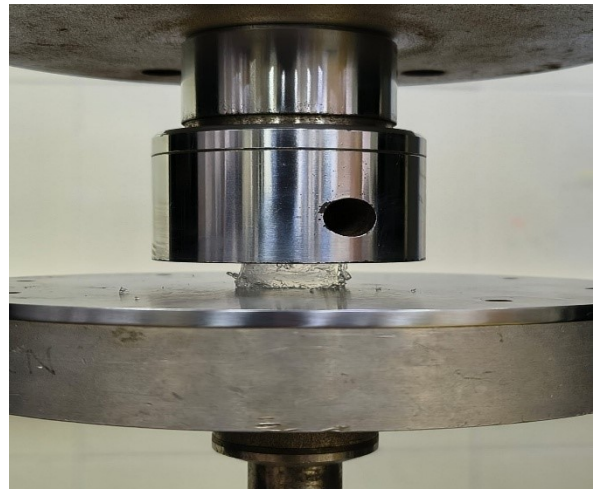

**Figure S3.** A compression test was

done on a double-layer hydrogel composite.

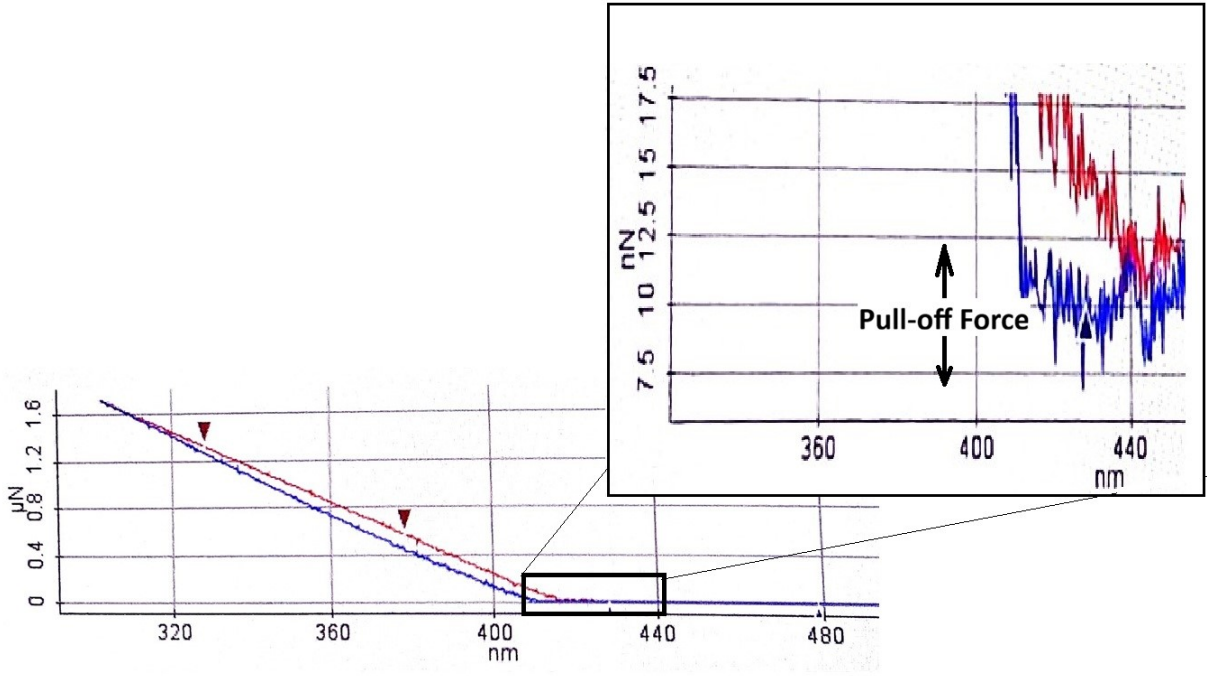

**Figure S4.** Representative AFM force-distance (FD) curve of the bilayer hydrogel system
